# Supplementary material for: Tumors diagnosed as cerebellar glioblastoma comprise distinct molecular entities
Source: PubMed Central journal article supplement (PMC6816155; doi:10.1186/s40478-019-0801-8), 2019-10-28
Supplement: 40478_2019_801_MOESM4_ESM.pdf [file 40478_2019_801_MOESM4_ESM.pdf]

#### Online resource 4: Average CNV loads of cerebellar and reference glioma methylation classes

| methylation class | cerebellar tumors |                      | reference tumors* |                      | p value<br>CNV loads  |
|-------------------|-------------------|----------------------|-------------------|----------------------|-----------------------|
|                   | n                 | average<br>CNV load  | n                 | average<br>CNV load  |                       |
| MC GBM MES        | 4                 | 4.05*10 <sup>8</sup> | 127               | 4.60*10 <sup>8</sup> | 0.727                 |
| MC GBM MID        | 11                | 1.11*10 <sup>9</sup> | 23                | 6.46*10 <sup>8</sup> | 0.053                 |
| MC GBM MYCN       | 3                 | 1.13*10 <sup>9</sup> | 18                | 1.07*10 <sup>9</sup> | 0.761                 |
| MC GBM RTK I      | 8                 | 6.10*10 <sup>8</sup> | 72                | 7.49*10 <sup>8</sup> | 0.261                 |
| MC GBM RTK II     | 2                 | 4.40*10 <sup>8</sup> | 171               | 6.23*10 <sup>8</sup> | n.a.                  |
| MC GBM RTK III    | 1                 | 2,13*10 <sup>9</sup> | 9                 | 5.38*10 <sup>8</sup> | n.a.                  |
| MC DMG K27**      | 6                 | 6.08*10 <sup>8</sup> | 33                | 5.82*10 <sup>8</sup> | 0.894                 |
| MC A IDH**        | 6                 | 3.22*10 <sup>8</sup> | 32                | 8.11*10 <sup>8</sup> | 5.10*10 <sup>-6</sup> |
| MC AAP            | 25                | 4.41*10 <sup>8</sup> | 16                | 3.83*10 <sup>8</sup> | 0.571                 |
| MC HGNET BCOR     | 1                 | 0                    | 14                | 1.29*10 <sup>8</sup> | n.a.                  |
| MC PA PF          | 2                 | 2.30*10 <sup>8</sup> | 109               | 8.35*10 <sup>7</sup> | n.a.                  |

Methylation classes and average CNV loads of 86 cerebellar tumors with the histological diagnosis of glioblastoma in comparison to 624 reference tumors. CNV – copy number variation, MC - methylation class, A IDH – IDH mutant glioma, AAP – anaplastic astrocytoma with piloid features, HGNET BCOR – high grade neuroepithelial tumor with BCOR alteration, PA PF - low grade glioma, pilocytic astrocytoma GBM MID/MES/RTK I/RTK II/RTK III/MYCN – glioblastoma IDH wildtype subclasses midline/mesenchymal/RTK I/II/III/MYCN, DMG K27 – diffuse midline glioma H3 K27M mutant

\*All reference tumors are of supratentorial localization, except for MC PA PF.

\*\* Frequencies of these tumors in the cerebellum may be biased depending on the supplier diagnosis, the date of diagnosis and the availability and application of antibodies/sequencing methods detecting IDH and histone mutations.

*Reinhardt et al., Acta Neuropathologica: “Tumors diagnosed as cerebellar glioblastoma comprise distinct molecular entities”, correspondence: andreas.vondeimling@med.uni-heidelberg.de*
